# Supplementary material
Source: ML conference proceedings conference paper supplement (https://openaccess.thecvf.com/content/CVPR2024/html/Hruby_Efficient_Solution_of_CVPR_2024_paper.html)
Supplement: Supplementary file 1 [file Hruby_Efficient_Solution_of_CVPR_2024_supplemental.pdf]

# Efficient Solution of Point-Line Absolute Pose

## Supplementary Material

### A. P2P1L in the coplanar case

Here, we describe the modified version of the P2P1L solver (Sec. 2.1) capable of handling the coplanar case. The input and output to this solver are the same as those of the original P2P1L solver.

The solver is identical to the original P2P1L solver until Equation (12). Then, we express values  $R_{11}, R_{31}, R_{22}$  in terms of  $R_{21}, R_{23}$  as

$$\begin{aligned}
 R_{11} &= \frac{b_2 a_1 - b_1 a_2}{b_1 b_2 X_2 (Y_3 - Y_4)} \\
 &\cdot \left( \left( Y_3 X_4 - Y_4 X_3 + \frac{b_1 a_2 (X_2 Y_3 - X_1)}{b_2 a_1 - b_1 a_2} \right) R_{21} \right. \\
 &\quad \left. + Z_4 Y_3 R_{23} \right) \\
 R_{31} &= \left( \frac{b_2 - b_1}{b_1 b_2 X_2 (Y_3 - Y_4)} \left( Y_3 X_4 - Y_4 X_3 + \right. \right. \\
 &\quad \left. \left. \frac{b_1 a_2 (X_2 Y_3 - X_1)}{b_2 a_1 - b_1 a_2} \right) + \frac{a_1 - a_2}{b_2 a_1 - b_1 a_2} \right) R_{21} \\
 &\quad + \frac{(b_2 - b_1) Z_4 Y_3}{b_1 b_2 X_2 (Y_3 - Y_4)} R_{23}, \\
 R_{22} &= \left( \frac{1}{Y_3 (Y_3 - Y_4)} \left( Y_3 X_4 - Y_4 X_3 + \right. \right. \\
 &\quad \left. \left. \frac{b_1 a_2 (X_2 Y_3 - X_1)}{b_2 a_1 - b_1 a_2} \right) - \frac{X_3}{Y_3} - \frac{b_1 a_2 X_2}{Y_3 (b_2 a_1 - b_1 a_2)} \right) R_{21} \\
 &\quad + \frac{Z_4}{Y_3 - Y_4} R_{23}
 \end{aligned} \tag{42}$$

Then, we substitute (42) into (9), to obtain two bivariate

quadratic constraints in  $R_{21}$  and  $R_{23}$ . We can write them in matrix form as

$$\begin{pmatrix} c_1 & c_2 & c_3 \\ d_1 & d_2 & d_3 \end{pmatrix} \cdot \begin{pmatrix} R_{21}^2 \\ R_{21} R_{23} \\ R_{23}^2 \end{pmatrix} = \begin{pmatrix} 1 \\ 1 \end{pmatrix}, \tag{43}$$

where the coefficients  $c_1, c_2, c_3, d_1, d_2, d_3$  are rational functions of the problem data. Similarly to the original solver, we apply the change of variables

$$u = R_{21}^2, \quad v = R_{23}/R_{21} \tag{44}$$

Subtracting the two equations in (43), we obtain

$$(c_1 - d_1)u + (c_2 - d_2)uv + (c_3 - d_3)uv^2 = 0.$$

Assuming  $u \neq 0$ , we therefore have the univariate quadratic equation in  $v$

$$(c_1 - d_1) + (c_2 - d_2)v + (c_3 - d_3)v^2 = 0. \tag{45}$$

We recover value  $v$  as one of the roots of (45) and  $u$  as

$$u = (c_1 + c_2 v + c_3 v^2)^{-1}, \quad \text{or} \quad u = (d_1 + d_2 v + d_3 v^2)^{-1}. \tag{46}$$

After the values  $u, v$  are recovered, we obtain  $R_{21}, R_{23}$  according to (43) and  $R_{11}, R_{31}, R_{22}$  according to (42). The rest of the solver is identical to the original solver.

### B. Evaluation of the pose error.

In this section, we show the pose estimation errors obtained in the RANSAC experiment, following the same experimental setup as in Sec. 3.2. The results are presented in Table 6. As expected, the errors are the same for all solvers. This demonstrates that our solvers can achieve improved runtimes without sacrificing any accuracy.

| Dataset     | P2P1L         |               |               |               | P1P2L         |               |
|-------------|---------------|---------------|---------------|---------------|---------------|---------------|
|             | OUR           | 3Q3           | Ram. SVD      | Ram. LU       | OUR           | 3Q3           |
| Model House | 0.251, 0.429  | 0.251, 0.429  | 0.251, 0.429  | 0.251, 0.429  | 0.251, 0.429  | 0.251, 0.429  |
| Corridor    | 0.573, 0.580  | 0.573, 0.580  | 0.573, 0.580  | 0.573, 0.580  | 0.573, 0.580  | 0.573, 0.580  |
| Merton I    | 0.005, 3.2e-4 |
| Merton II   | 0.003, 4.6e-4 |
| Merton III  | 0.007, 0.001  | 0.007, 0.001  | 0.007, 0.001  | 0.007, 0.001  | 0.007, 0.001  | 0.007, 0.001  |
| Library     | 0.011, 0.002  | 0.011, 0.002  | 0.011, 0.002  | 0.011, 0.002  | 0.011, 0.002  | 0.011, 0.002  |
| Wadham      | 0.007, 0.001  | 0.007, 0.001  | 0.007, 0.001  | 0.007, 0.001  | 0.007, 0.001  | 0.007, 0.001  |

Table 6. RANSAC error, on Oxford Multi-view dataset [1], in degrees. Every cell shows rotation and translation error.
